# Supplementary material
Source: PubMed Central journal article supplement (PMC4031295)
Supplement: NIHMS567701-supplement-Supplemental_Material.pdf [file NIHMS567701-supplement-Supplemental_Material.pdf]

## **Supplement Material**

### **Methods**

#### **Primary cultures of neonatal rat ventricular myocytes**

Primary cultures of ventricular cardiomyocytes were prepared from 1-day-old Crl:(WI) BR-Wistar rats (Charles River Laboratories). A cardiomyocyte-rich fraction was obtained by centrifugation through a discontinuous Percoll gradient as described <sup>1</sup>.

#### **Construction of adenoviruses**

Recombinant adenovirus vectors were constructed, propagated, and titered as previously described <sup>2</sup>. Briefly, pBHGlox $\Delta$ E1,3 Cre (Microbix), including the  $\Delta$ E1 adenoviral genome, was co-transfected with the pDC316 shuttle vector containing the gene of interest into HEK293 cells using LipofectAMINE 2000 (Life Technologies). Through homologous recombination, the test genes were integrated into the E1-deleted adenoviral genome. The viruses were propagated in HEK293 cells. We made replication-defective human adenovirus type 5 (devoid of E1) harboring myc-MurF1. Adenovirus harboring  $\beta$ -galactosidase (Ad-LacZ) was used as a control.

#### **Construction of short hairpin RNA (shRNA) adenoviral expression vector**

The pSilencer 1.0-U6 expression vector was purchased from Ambion. The U6 RNA polymerase III promoter and the polylinker region were subcloned into the adenoviral shuttle vector pDC311 (Microbix). A hairpin-forming oligo corresponding to bases 616-638 (5'-GGAGGAACTGAGCCACAAGTTCAAGAGACTTGTGGCTCAGT TCCTCCTTTTTTGGAAA-3') of the rat MurF1 cDNA and its antisense were synthesized with ApaI and HindIII overhangs, annealed, and subcloned distal to the U6 promoter. The loop sequence is underlined. A recombinant adenovirus was made by homologous recombination in HEK293 cells as described above.

### **Immunoblot analysis**

For immunoblot analyses, heart homogenates were prepared in RIPA lysis buffer containing 50 mM Tris (pH 7.5), 150 mM NaCl, 1% IGEPAL CA-630, 0.1% SDS, 0.5% deoxycholic acid, 10 mM  $\text{Na}_4\text{P}_2\text{O}_7$ , 5 mM EDTA, 0.1 mM  $\text{Na}_3\text{VO}_4$ , 1 mM NaF, 0.5 mM 4-(2-Aminoethyl) benzenesulfonyl fluoride hydrochloride (AEBSF), 0.5 mg/ml aprotinin, and 0.5 mg/ml leupeptin. Immunoblots were performed as previously described<sup>3</sup>. The antibodies used include anti-MuRF1 (ECM Biosciences), anti-CnA (BD Biosciences), anti-NFAT1 (Abcam), anti-Histone H3 (Cell Signaling Technologies), anti-creatine kinase (CK)-MB, anti-Troponin-I and anti-ubiquitin (Santa Cruz), anti- $\beta$ -myosin heavy chain (MYH) and anti-GAPDH (SIGMA) antibodies.

### **Nuclear and cytosol extract preparation**

Cells were washed in PBS and resuspended in hypotonic buffer, containing 10 mM HEPES (pH 7.9), 10 mM KCl, 0.1 mM EDTA, 0.1 mM EGTA, 100  $\mu\text{M}$   $\text{Na}_3\text{VO}_4$ , 1 mM DTT, and 500  $\mu\text{M}$  PMSF. The cells were then lysed by adding 10% IGEPAL CA-630 and vortexing vigorously. Nuclei were pelleted by centrifugation at 800 X g for 30 min. The supernatant (cytosol) was saved for analysis. The nuclei were then resuspended in hypertonic buffer, containing 20 mM HEPES (pH 7.9), 400 mM NaCl, 1 mM EDTA, 1 mM EGTA, 20% glycerol, 100  $\mu\text{M}$   $\text{Na}_3\text{VO}_4$ , 1 mM DTT, and 500  $\mu\text{M}$  PMSF, and rocked for 30 min on a shaking platform at 4°C. The samples were centrifuged at 16,000 X g for 5 min, and the supernatant (nuclear extracts) was saved.

### **Immunoprecipitation**

Cardiac myocytes were lysed with IGEPAL CA-630 buffer (50 mM Tris-HCl (pH 7.4), 1% IGEPAL CA-630, 10 mM EDTA, 150 mM NaCl, 50 mM NaF, 1  $\mu\text{M}$  leupeptin, and 0.1  $\mu\text{M}$  aprotinin). Primary antibody was covalently immobilized on protein A/G agarose using the

Pierce<sup>®</sup> Crosslink Immunoprecipitation Kit according to the manufacturer's instructions (Thermo Scientific). Samples were incubated with immobilized antibody beads for at least 2 h at 4°C. After immunoprecipitation, the samples were washed with TBS five times. They were then eluted with glycine-HCl (0.1 M, pH 3.5), and the immunoprecipitates were subjected to immunoblotting using specific primary antibodies and a conformation-specific secondary antibody that recognizes only the native IgG (Cell Signaling).

### **Luciferase assay**

Hearts were harvested and weighed, and equal amounts of the heart homogenates were subjected to luciferase assays using a luciferase assay system (Promega)<sup>4</sup>.

### **Calcineurin activity assay**

Phosphatase activity was measured by using a calcineurin assay kit (Enzo Life Sciences) according to the manufacturer's instructions. Heart homogenates from Tg-ZAKI, *Murf1*<sup>-/-</sup>, *Murf1*<sup>-/-</sup>-Tg-ZAKI and NTg mice were prepared, and calcineurin activity was measured as the dephosphorylation rate of a synthetic phosphopeptide substrate (RII peptide) in the presence or absence of EGTA. The amount of PO<sub>4</sub> release was determined photometrically using the Biomol Green reagent (Enzo Life Sciences). The activity of calcineurin in each sample was normalized to the amount of total protein in the sample.

### **Calcineurin turnover assay**

Cycloheximide (CHX) chase for evaluating calcineurin turnover was performed as described previously with modification<sup>5</sup>. Briefly, cultured cardiomyocytes were transduced with either Ad-sh-MuRF1 or Ad-sh-scramble. Ninety-six hours following transduction, cells were incubated with 50 ng/ml CHX for the indicated periods of time, after which lysates were immediately collected into lysis buffer.

### **Transverse aortic constriction (TAC)**

The method used to impose PO on mice has been described <sup>6</sup>. As controls, sham operations were performed without constricting the aorta. After 2 or 4 weeks, echocardiography and hemodynamic measurements were performed as described <sup>7</sup>.

### **Echocardiography**

Mice were anesthetized with 12 µl/g of body weight of 2.5% Avertin (Sigma), and echocardiography was performed with ultrasonography (Acuson Sequoia C256, Siemens Medical Solutions) as previously described <sup>8</sup>.

### **Histological analyses**

Heart specimens were fixed with formalin, embedded in paraffin, and sectioned into 6 mm-thick slices. Interstitial fibrosis was evaluated by Masson's Trichrome staining <sup>9</sup>. Myocyte cross-sectional area was measured from images taken of wheat germ agglutinin (WGA)-stained 1 mm-thick sections <sup>9</sup>. The outline of 100-200 myocytes was traced in each section, using the MetaMorph image system. DNA fragmentation was detected *in situ* using TUNEL staining <sup>10</sup>.

### **Immunofluorescence microscopy**

Cardiomyocytes were fixed with 3.7% paraformaldehyde in PBS for 10 min and incubated with PBS containing 0.5% Triton X-100 for 15 min. After being washed with PBS, the cells were first incubated with primary antibodies in PBS, and then incubated with secondary antibodies in PBS.

### **Analysis of messenger RNA (mRNA) expression**

Total RNA from the heart was extracted using TRIzol (Life Technologies) and first-strand cDNA was generated using a first-strand cDNA synthesis kit (GE Healthcare Biosciences)<sup>11</sup>. Real-time PCR was carried out using specific primers as described<sup>11</sup>.

## References

1. Maejima Y, Kyoji S, Zhai P, Liu T, Li H, Ivessa A, Sciarretta S, Del Re DP, Zablocki DK, Hsu CP, Lim DS, Isobe M, Sadoshima J. Mst1 inhibits autophagy by promoting the interaction between beclin1 and bcl-2. *Nat Med*. 2013;19:1478-1488. doi: 10.1038/nm.3322. Epub 2013 Oct 14.
2. Hardt SE, Tomita H, Katus HA, Sadoshima J. Phosphorylation of eukaryotic translation initiation factor 2bepsilon by glycogen synthase kinase-3beta regulates beta-adrenergic cardiac myocyte hypertrophy. *Circ Res*. 2004;94:926-935.
3. Yamamoto S, Yang G, Zablocki D, Liu J, Hong C, Kim SJ, Soler S, Odashima M, Thaisz J, Yehia G, Molina CA, Yatani A, Vatner DE, Vatner SF, Sadoshima J. Activation of mst1 causes dilated cardiomyopathy by stimulating apoptosis without compensatory ventricular myocyte hypertrophy. *J Clin Invest*. 2003;111:1463-1474.
4. Gelpi RJ, Gao S, Zhai P, Yan L, Hong C, Danridge LM, Ge H, Maejima Y, Donato M, Yokota M, Molkenin JD, Vatner DE, Vatner SF, Sadoshima J. Genetic inhibition of

calcineurin induces diastolic dysfunction in mice with chronic pressure overload. *Am J*

*Physiol Heart Circ Physiol.* 2009;297:H1814-1819

5. Foo RS, Chan LK, Kitsis RN, Bennett MR. Ubiquitination and degradation of the anti-apoptotic protein arc by mdm2. *J Biol Chem.* 2007;282:5529-5535
6. Usui S, Maejima Y, Pain J, Hong C, Cho J, Park JY, Zablocki D, Tian B, Glass DJ, Sadoshima J. Endogenous muscle atrophy f-box mediates pressure overload-induced cardiac hypertrophy through regulation of nuclear factor-kappaB. *Circ Res.* 2011;109:161-171
7. Zhai P, Galeotti J, Liu J, Holle E, Yu X, Wagner T, Sadoshima J. An angiotensin ii type 1 receptor mutant lacking epidermal growth factor receptor transactivation does not induce angiotensin ii-mediated cardiac hypertrophy. *Circ Res.* 2006;99:528-536
8. Odashima M, Usui S, Takagi H, Hong C, Liu J, Yokota M, Sadoshima J. Inhibition of endogenous mst1 prevents apoptosis and cardiac dysfunction without affecting cardiac hypertrophy after myocardial infarction. *Circ Res.* 2007;100:1344-1352
9. Zhai P, Yamamoto M, Galeotti J, Liu J, Masurekar M, Thaisz J, Irie K, Holle E, Yu X, Kupersmidt S, Roden DM, Wagner T, Yatani A, Vatner DE, Vatner SF, Sadoshima J.

Cardiac-specific overexpression of  $\alpha_1$  receptor mutant lacking  $\beta$  subunit causes hypertrophy and bradycardia in transgenic mice. *J Clin Invest.*

2005;115:3045-3056

10. Matsui Y, Takagi H, Qu X, Abdellatif M, Sakoda H, Asano T, Levine B, Sadoshima J.

Distinct roles of autophagy in the heart during ischemia and reperfusion: Roles of

AMP-activated protein kinase and beclin 1 in mediating autophagy. *Circ Res.*

2007;100:914-922

11. Zhai P, Gao S, Holle E, Yu X, Yatani A, Wagner T, Sadoshima J. Glycogen synthase

kinase-3 $\alpha$  reduces cardiac growth and pressure overload-induced cardiac

hypertrophy by inhibition of extracellular signal-regulated kinases. *J Biol Chem.*

2007;282:33181-33191

**Online Table 1**Postmortem pathologic measurements in control and *Murfl*<sup>-/-</sup> mice 2 weeks after TAC

|                         | WT        |                        | <i>Murfl</i> <sup>-/-</sup> |                          |
|-------------------------|-----------|------------------------|-----------------------------|--------------------------|
|                         | Sham      | TAC                    | Sham                        | TAC                      |
| N                       | 7         | 6                      | 6                           | 8                        |
| BW (g)                  | 25.6±1.1  | 24.8±0.7               | 25.7±1.1                    | 25.9±0.7                 |
| TL(mm)                  | 18.0±0.2  | 17.9±0.3               | 18.3±0.2                    | 18.1±0.2                 |
| LV (mg)                 | 88.3±2.7  | 126.7±8.7 <sup>A</sup> | 94.7±4.8                    | 158.5±6.2 <sup>A,B</sup> |
| RV (mg)                 | 18.6±1.4  | 22.3±1.7               | 20.7±2.0                    | 23.9±2.0                 |
| LV weight/BW (mg/g)     | 3.47±0.11 | 5.08±0.27 <sup>A</sup> | 3.69±0.11                   | 6.13±0.19 <sup>A,B</sup> |
| Lung weight/BW (mg/g)   | 5.24±0.15 | 6.30±0.87              | 5.15±0.17                   | 6.86±0.69                |
| Liver weight/BW (mg/g)  | 45.0±4.5  | 40.8±1.9               | 44.9±2.6                    | 42.6±1.0                 |
| LV weight/TL (mg/mm)    | 4.99±0.15 | 7.05±0.41 <sup>A</sup> | 5.19±0.25                   | 8.73±0.27 <sup>A,B</sup> |
| Lung weight/TL (mg/mm)  | 7.31±0.09 | 8.70±1.17              | 7.23±0.34                   | 9.79±1.05                |
| Liver weight/TL (mg/mm) | 62.7±5.8  | 56.4±2.8               | 63.5±5.6                    | 60.8±2.4                 |

Data are mean ± SEM. <sup>A</sup>*P* < 0.01 compared with same genotype sham mice. <sup>B</sup>*P* < 0.05 compared with WT 2 weeks after TAC.



**Online Table 2**Postmortem pathologic measurements in control and *Murfl*<sup>-/-</sup> mice 4 weeks after TAC

---

|                         | WT        |                         | <i>Murfl</i> <sup>-/-</sup> |                           |
|-------------------------|-----------|-------------------------|-----------------------------|---------------------------|
|                         | Sham      | TAC                     | Sham                        | TAC                       |
| N                       | 7         | 5                       | 5                           | 5                         |
| BW (g)                  | 26.4±1.1  | 28.1±1.1                | 25.8±1.3                    | 29.8±0.6                  |
| TL(mm)                  | 18.0±0.2  | 17.6±0.2                | 18.3±0.1                    | 17.4±0.2                  |
| LV (mg)                 | 88.3±2.7  | 155.0±12.7 <sup>A</sup> | 90.5±4.4                    | 205.0±11.1 <sup>A,C</sup> |
| RV (mg)                 | 18.6±1.4  | 21.4±1.7 <sup>A</sup>   | 20.0±1.8                    | 31.0±3.4 <sup>A</sup>     |
| LV weight/BW (mg/g)     | 3.58±0.15 | 5.50±0.30 <sup>A</sup>  | 3.52±0.10                   | 6.89±0.40 <sup>A,C</sup>  |
| Lung weight/BW (mg/g)   | 5.24±0.15 | 6.48±0.49 <sup>A</sup>  | 4.96±0.21                   | 9.55±1.49 <sup>A</sup>    |
| Liver weight/BW (mg/g)  | 45.0±4.5  | 39.3±1.8                | 41.0±0.9                    | 45.5±1.5                  |
| LV weight/TL (mg/mm)    | 4.99±0.15 | 8.88±0.64 <sup>A</sup>  | 5.11±0.30                   | 11.9±0.63 <sup>A,C</sup>  |
| Lung weight/TL (mg/mm)  | 7.31±0.09 | 10.4±0.51 <sup>A</sup>  | 7.21±0.50                   | 16.6±2.70 <sup>A,C</sup>  |
| Liver weight/TL (mg/mm) | 62.7±5.8  | 63.5±4.2                | 59.7±4.2                    | 78.9±3.4                  |

---

Data are mean ± SEM. <sup>A</sup>*P* < 0.01 compared with same genotype sham mice. <sup>C</sup>*P* < 0.01 compared with WT 4 weeks after TAC.

**Online Table 3**Echocardiographic analyses in control and *Murf1*<sup>-/-</sup> mice 2 weeks after TAC

---

|             | WT        |                        | <i>Murf1</i> <sup>-/-</sup> |                          |
|-------------|-----------|------------------------|-----------------------------|--------------------------|
|             | Sham      | TAC                    | Sham                        | TAC                      |
| N           | 7         | 6                      | 6                           | 8                        |
| DSEPWT (mm) | 0.69±0.02 | 0.97±0.04 <sup>B</sup> | 0.75±0.03                   | 1.17±0.08 <sup>B,C</sup> |
| LVEDD (mm)  | 4.13±0.13 | 3.99±0.12              | 4.15±0.12                   | 4.10±0.11                |
| DPWT (mm)   | 0.64±0.03 | 0.92±0.04 <sup>B</sup> | 0.72±0.03                   | 1.11±0.06 <sup>B,C</sup> |
| LVESD (mm)  | 2.97±0.11 | 2.88±0.11              | 2.98±0.11                   | 3.13±0.13                |
| EF (%)      | 62.9±1.8  | 57±3                   | 63.06±2.02                  | 52.6±2.3 <sup>A</sup>    |
| FS (%)      | 28.2±1.1  | 27.8±1.0               | 28.4±1.1                    | 21.8±1.9 <sup>A</sup>    |
| HR (bpm)    | 412±19    | 411±13                 | 406±13                      | 395±10                   |

---

Data are mean ± SEM. <sup>A</sup>*P* < 0.05, <sup>B</sup>*P* < 0.01 compared with same genotype sham mice.

<sup>C</sup>*P* < 0.01 compared with WT 2 weeks after TAC.

DSEPWT: diastolic septal wall thickness; LVEDD: left ventricular end-diastolic dimension; DPWT: diastolic posterior wall thickness; LVESD: left ventricular end-systolic dimension; EF: ejection fraction; FS: fractional shortening; HR: heart rate.

**Online Table 4**Echocardiographic analyses in control and *Murf1*<sup>-/-</sup> mice 4 weeks after TAC

---

|             | WT         |                        | <i>Murf1</i> <sup>-/-</sup> |                           |
|-------------|------------|------------------------|-----------------------------|---------------------------|
|             | Sham       | TAC                    | Sham                        | TAC                       |
| N           | 7          | 5                      | 5                           | 5                         |
| DSEPWT (mm) | 0.69±0.02  | 1.23±0.06 <sup>A</sup> | 0.74±0.04                   | 1.25±0.05 <sup>A</sup>    |
| LVEDD (mm)  | 4.13±0.13  | 3.95±0.12              | 4.02±0.16                   | 4.16±0.15                 |
| DPWT (mm)   | 0.64±0.03  | 1.15±0.08 <sup>A</sup> | 0.72±0.04                   | 1.20±0.07 <sup>A</sup>    |
| LVESD (mm)  | 2.97±0.11  | 2.89±0.11              | 2.81±0.14                   | 3.21±0.07                 |
| EF (%)      | 62.87±1.76 | 50.51±2.66             | 65.70±1.49                  | 40.25±2.36 <sup>A,B</sup> |
| FS (%)      | 28.23±1.12 | 26.83±1.47             | 30.04±1.00                  | 16.67±1.68 <sup>A,B</sup> |
| HR (bpm)    | 412±19     | 405±14                 | 413±15                      | 432±18                    |

---

Data are mean ± SEM. <sup>A</sup>*P* < 0.01 compared with sham mice of the same genotype. <sup>B</sup>*P* < 0.05 compared with WT 4 weeks after TAC.

DSEPWT: diastolic septal wall thickness; LVEDD: left ventricular end-diastolic dimension; DPWT: diastolic posterior wall thickness; LVESD: left ventricular end-systolic dimension; EF: ejection fraction; FS: fractional shortening; HR: heart rate.

A

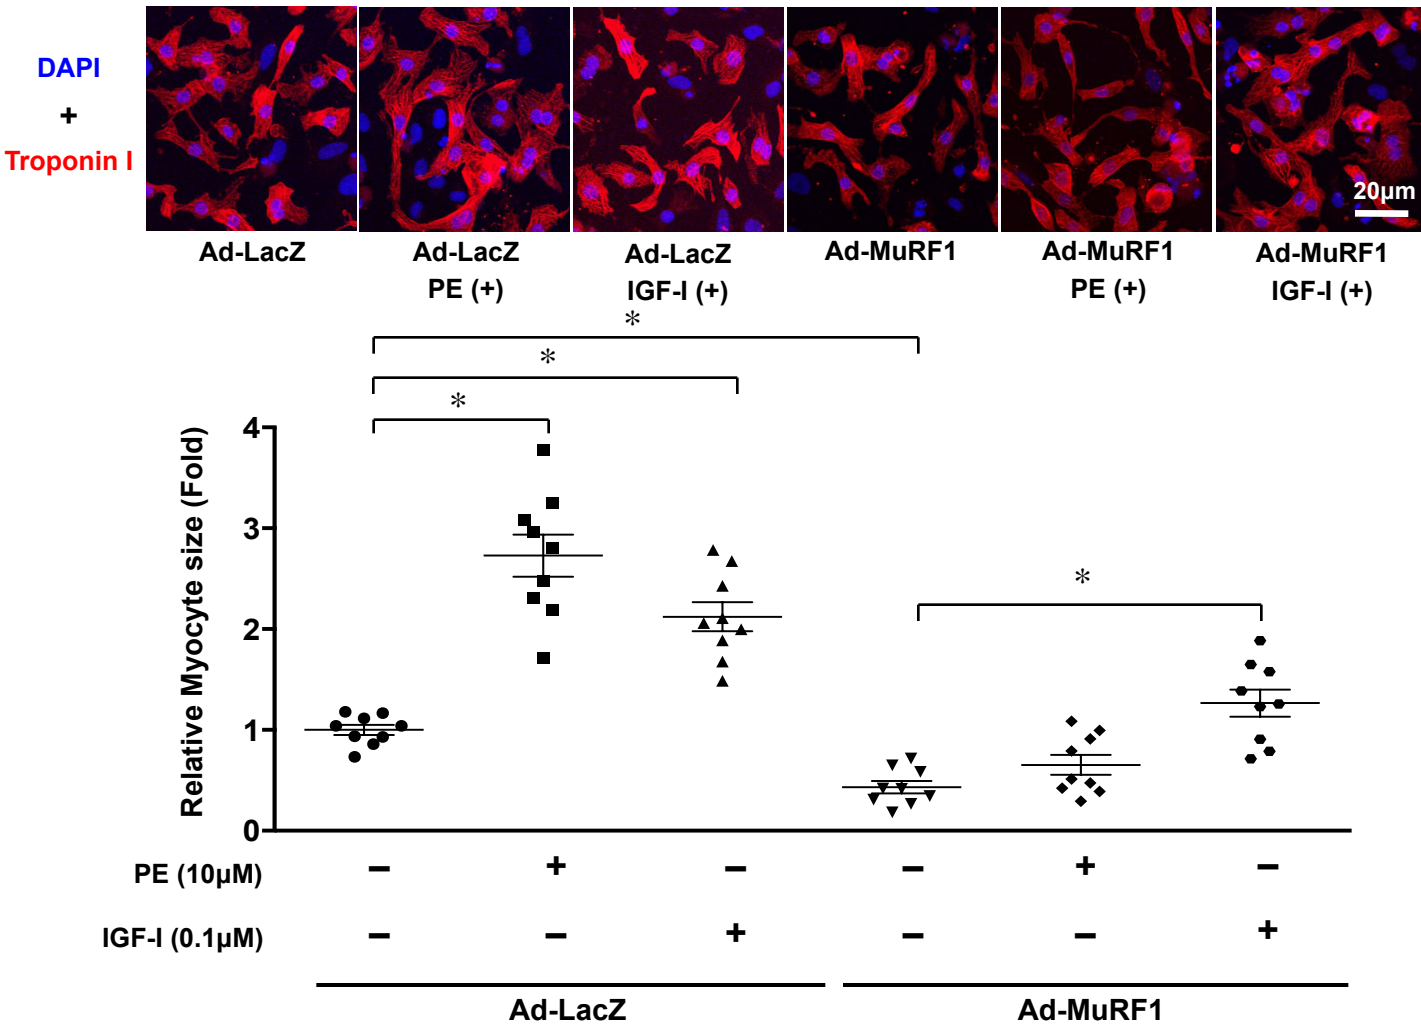

B

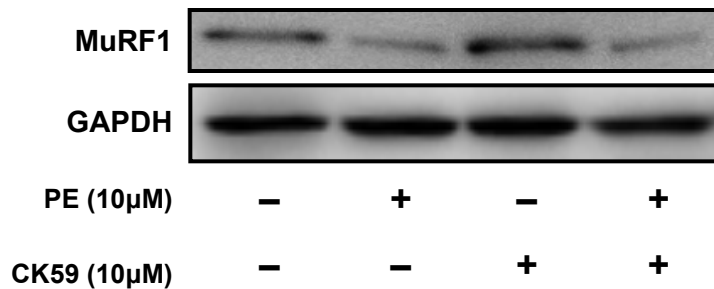

**Online Figure I. A, Upper:** Representative images of neonatal rat cultured cardiomyocytes treated with PE or IGF-I and the indicated adenoviruses. The cells were observed under a fluorescent microscope. **Lower:** Relative cell size of myocytes treated with the indicated adenoviruses in the presence or absence of PE or IGF-I for 48 hours was examined \*  $P < 0.05$  ( $N = 9$ ). **B,** Cultured cardiomyocytes were treated with CK59, a CaMKII inhibitor, and then harvested after 48 hr. Immunoblot analysis was performed using anti-MuRF1 antibody.

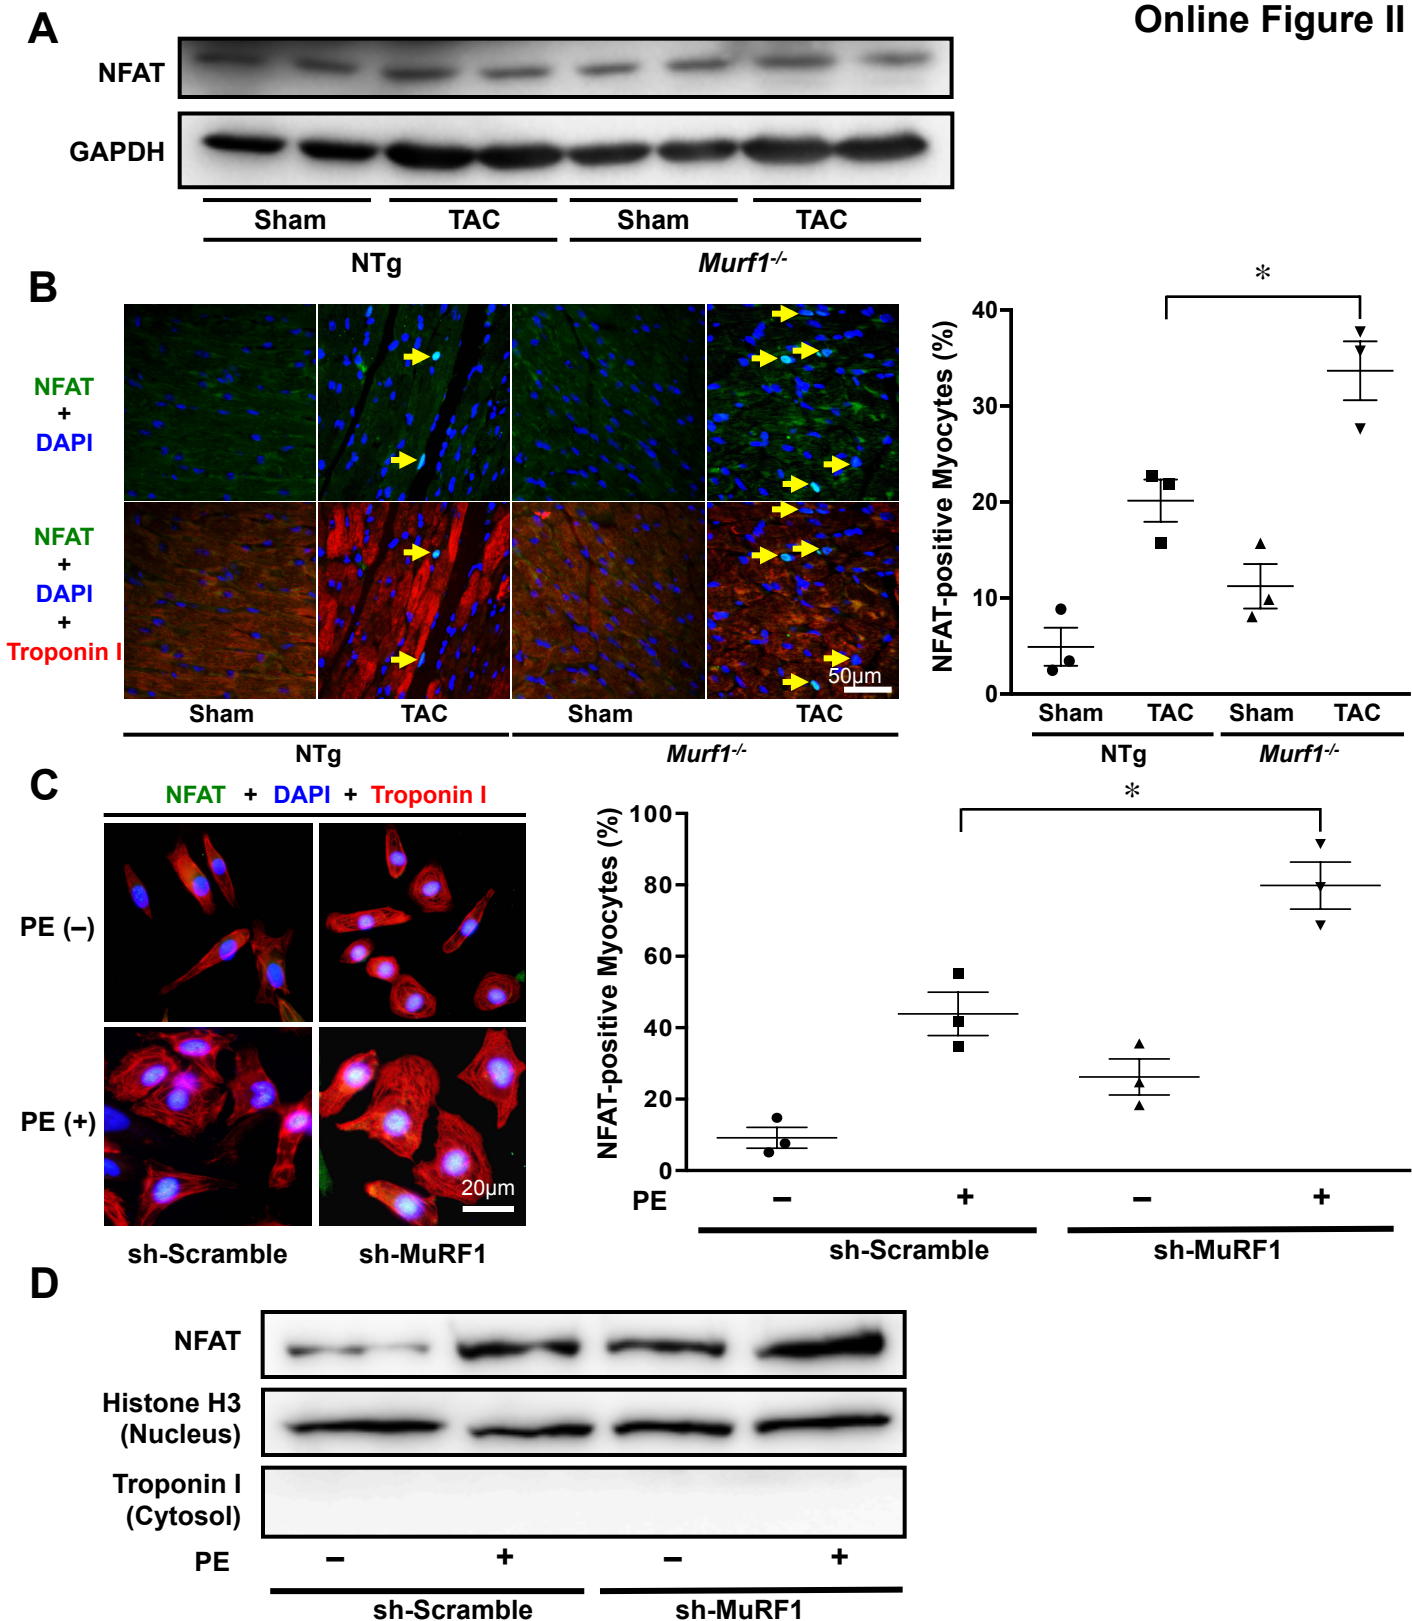

**Online Figure II. A,** Expression of NFAT in mouse hearts in response to TAC (4 weeks) was determined by immunoblotting. **B, Left:** Immunohistochemistry of NFAT. Arrows indicate nuclear localization of NFAT. **Right:** NFAT-positive myocytes were counted. \*  $P < 0.05$  ( $N = 3$ ). **C, Left:** The extent of nuclear expression of NFAT was determined by triple immunostaining with anti-NFAT antibody (green), anti-troponin I antibody (red) and DAPI (blue). **Right:** Nuclear NFAT-positive myocytes were counted. \*  $P < 0.05$  ( $N = 3$ ). **D,** Cytosolic and nuclear fractions were prepared from Ad-shScramble- and Ad-shMuRF1-transduced cardiomyocytes. Immunoblot analyses were conducted with NFAT antibody. The purity of the nuclear fraction was confirmed by the lack of Troponin I. Representative immunoblot images are shown.
